# Supplementary material for: Design of an alkaline pyridyl acceptor-based calix[4]arene dye and synthesis of stable calixarene–TiO2 porous hybrid materials for efficient photocatalysis
Source: Royal Society of Chemistry journal article supplement (doi:10.1039/d0ta00754d), 2020-01-01
Supplement: d0ta00754d1.pdf [file d0ta00754d1.pdf]

## SUPPORTING INFORMATION

Design of an alkaline pyridyl acceptor-based calix[4]arene dye  
and synthesis of stable calixarene-TiO<sub>2</sub> porous hybrid materials for  
efficient photocatalysis

Yu-Hui Zhong<sup>a</sup>, Yang Lei<sup>a</sup>, Jian-Feng Huang<sup>a,\*</sup>, Li-Min Xiao<sup>b</sup>, Xin-Lun Chen<sup>a</sup>, Teng  
Luo<sup>a</sup>, Su Qin<sup>a</sup>, Jing Guo<sup>a</sup>, and Jun-Min Liu<sup>a,\*</sup>

## Table of Contents

|                                                                                                                                                                                                                                  |    |
|----------------------------------------------------------------------------------------------------------------------------------------------------------------------------------------------------------------------------------|----|
| 1. Experimental section.....                                                                                                                                                                                                     | 3  |
| 2. Scheme S1. The synthetic route of <b>C4BTP</b> .....                                                                                                                                                                          | 5  |
| 3. Scheme S2. The chemical structure of <b>ReP</b> .....                                                                                                                                                                         | 5  |
| 4. Fig. S1. N <sub>2</sub> adsorption-desorption isotherms of gel-TiO <sub>2</sub> and C4BTP-TiO <sub>2</sub> .....                                                                                                              | 10 |
| 5. Fig. S2. The pore size distributions of gel-TiO <sub>2</sub> and C4BTP-TiO <sub>2</sub> (5 wt%).....                                                                                                                          | 10 |
| 6. Table S1. BET surface areas, pore volumes, and pore widths of gel-TiO <sub>2</sub> and C4BTP-TiO <sub>2</sub> .....                                                                                                           | 11 |
| 7. Fig. S3. The TG-DTG spectrum of C4BTP-TiO <sub>2</sub> .....                                                                                                                                                                  | 11 |
| 8. Fig. S4. The EDX of Pt/C4BTP-TiO <sub>2</sub> .....                                                                                                                                                                           | 12 |
| 9. Table S2. ICP-AES results of <b>ReP</b> loading and calculated TON values of corresponding catalysts.....                                                                                                                     | 12 |
| 10. Fig. S5. ATR-IR spectra of <b>C4BTP</b> , C4BTP-TiO <sub>2</sub> (5.0 wt%), <b>ReP</b> and ReP-C4BTP-TiO <sub>2</sub> (5.0 wt%).....                                                                                         | 13 |
| 11. Fig. S6. 2p XPS spectra, N 1s XPS spectra, full XPS spectra of <b>C4BTP</b> and C4BTP-TiO <sub>2</sub> (5.0 wt%) samples.....                                                                                                | 13 |
| 12. Fig. S7. Cyclic voltammogram of <b>C4BTP</b> in 0.1 M TBAPF <sub>6</sub> in THF solution with a scan rate of 40 mV s <sup>-1</sup> .....                                                                                     | 14 |
| 13. Table S3. H <sub>2</sub> production data of Pt/C4BTP-TiO <sub>2</sub> with different dye contents and Pt/gel-TiO <sub>2</sub> /C4BTP materials.....                                                                          | 14 |
| 14. Table S4. Performances of DSP systems based on metal-free sensitizers for photocatalytic H <sub>2</sub> production studies in recent years.....                                                                              | 15 |
| 15. Table S5. H <sub>2</sub> production and AQY results of Pt/C4BTP/gel-TiO <sub>2</sub> and Pt/C4BTP-TiO <sub>2</sub> with different dye contents.....                                                                          | 16 |
| 16. Table S6. H <sub>2</sub> production data and calculated TON values of Pt/C4BTP-TiO <sub>2</sub> (5.0 wt%) in recycling experiment.....                                                                                       | 16 |
| 17. Fig. S8. <sup>13</sup> C NMR spectra of carbon source A) before and B) after irradiation.....                                                                                                                                | 17 |
| 18. Fig. S9. GC-MS spectra of ReP-C4BTP-TiO <sub>2</sub> in the A) <sup>13</sup> CO <sub>2</sub> -saturated and B) CO <sub>2</sub> -saturated DMF- <i>d</i> <sub>7</sub> with BIH under visible light ( $\lambda > 420$ nm)..... | 18 |
| 19. Fig. S10. A) Emission spectra and B) photoluminescence decays of C4BTP, sensitized gel-TiO <sub>2</sub> /C4BTP and C4BTP-TiO <sub>2</sub> (5.0wt%).....                                                                      | 19 |
| 20. References.....                                                                                                                                                                                                              | 19 |

## Experimental section

### Materials

Solvents were purified using an MBRAUN MB SPS-800 system. Anhydrous solvents used in the Suzuki coupling reaction were degassed by bubbling with N<sub>2</sub> for 20 min. All other chemicals and reagents were used as received from commercial sources without further purification. Specifically, butyl titanate (Ti(OBu)<sub>4</sub>) 99.0%, tetrahydrofuran (THF) 99.0%, acetic acid 99.5%, ethanol 99.5%, methanol 99.5%, TEOA 98.0%, and H<sub>2</sub>PtCl<sub>6</sub>•6H<sub>2</sub>O 99.95% were used.

### Characterizations

The <sup>1</sup>H and <sup>13</sup>C NMR spectra were tested on a Bruker 400 MHz spectrometer. Mass spectra data were obtained on an ultrafleXtreme MALDI-TOF/TOF mass spectrometer (Bruker Daltonics). The absorption spectra were observed with a Shimadzu UV-3600 spectrometer and fluorescence spectra were measured with an Edinburgh Instruments Ltd FLS980 spectrometer. Powder X-ray diffraction (PXRD) was recorded on a Rigaku Smart Lab diffractometer (Bragg-Brentano geometry, Cu-Kα1 radiation, λ = 1.54056 Å). Transmission electron microscopy (TEM) images, high-resolution transmission electron microscopy (HRTEM), high-angle annular dark field scanning transmission electron microscopy (HAADF-STEM) micrographs, selected area electron diffraction (SAED), energy dispersive X-ray spectroscopy (EDX), and elemental mapping were obtained by a JEM-2100F transmission electron microscope at 300 kV. Scanning electron microscopy (SEM) micrographs were recorded on Hitachi Ultra-high Resolution FE-SEM SU8010 microscope. Gas adsorption measurements were performed using ultra-high purity N<sub>2</sub> and CO<sub>2</sub> gas on Quantachrome Auto-sorb-iQ2-MP analyzer. The Mott-Schottky curves were measured using a CHI760E electro-chemical analyzer (China) in a three-electrode cell. Pt plate was used as counter electrode and Ag/AgCl electrode (3 M KCl) was used as reference electrode. The electrolyte was a 0.5 M Na<sub>2</sub>SO<sub>4</sub> aqueous solution. The working electrode was prepared on fluorine-doped tin oxide (FTO) glass by

dispersing materials (2 mg) in ethanol (1 mL) with Nafion (10  $\mu$ L), and the exposed area of the electrode was 1 cm<sup>2</sup>. The photocatalytic hydrogen production system was Perfect Light Lab Solar-IIIAG and H<sub>2</sub> measurement was performed on Agilent 7820A gas chromatography with a thermal conductivity detector (TCD). The amounts of Pt NPs and ReP loaded on samples were detected by ICP-AES (spectra range: 120-800 nm, holographic grating, 2924 line/mm, SPECTRO CIROS VISION). Attenuated total reflection-infrared intensity (ATR-IR) spectra were monitored by Frontier FT-IR spectrometer (spectra range 4000-450 cm<sup>-1</sup>, an average of 64 scans). X-ray photoelectron spectroscopy (XPS) measurements were carried out using an XR6 monochromated AlK $\alpha$  X-ray source ( $h\nu = 1486.6$  eV) with a 900 mm spot size in an ultrahigh vacuum chamber (ESCALAB 250Xi). The pass energy was 20 eV.

Cyclic voltammograms (CVs) were recorded using a CHI760E electrochemical analyzer with platinum plate as working electrode, Ag/AgCl (3 M KCl) as reference electrode, Pt wire as counter electrode, and 0.1 M tetrabutylammonium hexafluorophosphate (TBAPF<sub>6</sub>) as a supporting electrolyte in THF with a scan rate of 40 mV s<sup>-1</sup>.

For the CV tests, the determination of oxidation potential was calibrated by ferrocenium/ferrocene (Fc<sup>+</sup>/Fc) redox couple standard. Specifically, the initial oxidation potentials ( $E_{\text{onset}}$ ) of **C4BTP** and ferrocene were obtained from respective CV curves by using the tangent method. Then the corresponding HOMO and LUMO levels were calculated by equations  $E_{\text{HOMO}} = -(E_{\text{OX}} \text{ (vs Fc}^+/\text{Fc)} + 4.8)$  and  $E_{\text{LUMO}} = E_{\text{HOMO}} - E_{0-0}$ , where  $E_{\text{LUMO}}$  is relevant to the excited state potential of photosensitizer. The above equations rely on the scale: -4.8 eV for 0.0 V versus Fc<sup>+</sup>/Fc, which is based on the calculations obtained by Pommerehne et al,<sup>1</sup> and Bard and Faulkner reported -4.5 eV to be equivalent to 0.0 V vs. NHE.<sup>2</sup>

Apparent quantum yields (AQYs) were determined using an incident LED light source (Zolix, MLED4-1, M450L,  $\lambda = 450$  nm, light intensity 100 mW cm<sup>-2</sup>, irradiating area 0.8 cm<sup>2</sup>) at 20 °C. The number of incident photons was measured by a standard method using a K<sub>3</sub>[Fe<sup>III</sup>(C<sub>2</sub>O<sub>4</sub>)<sub>3</sub>] actinometer and the photon flux was determined to be 1083  $\mu$ mol h<sup>-1</sup>. And AQY ( $\Phi$ ) was calculated according to the

following equation:

$$\phi = \frac{\text{number of transferred electrons}}{\text{number of incident photons}} \times 100\% = \frac{n(\text{H}_2) \times 2}{n(\text{photons})} \times 100\%$$

## Synthesis

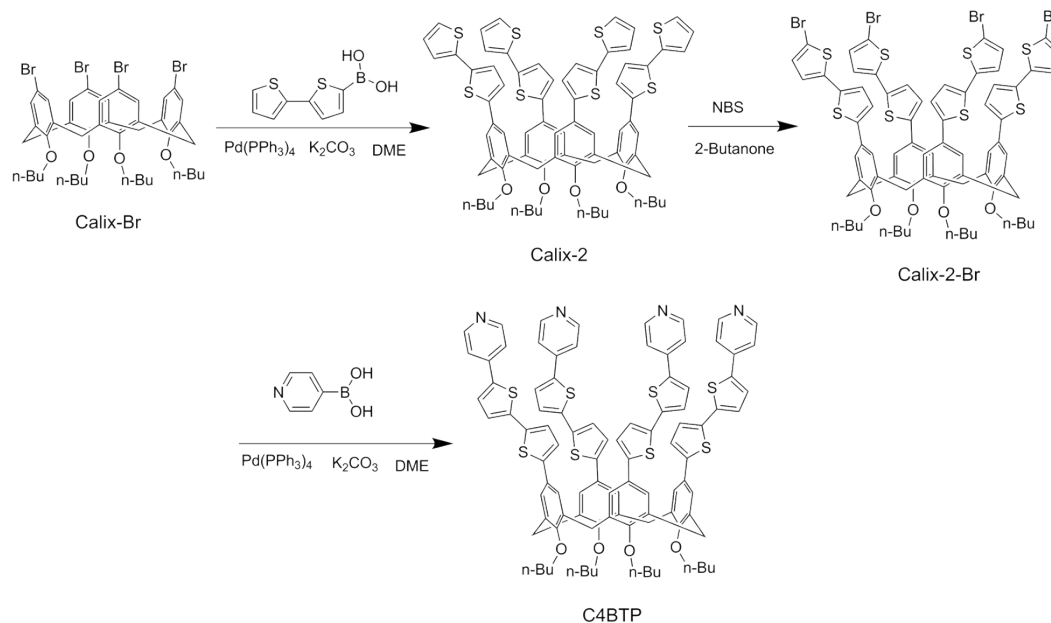

**Scheme S1.** The synthetic route of **C4BTP**.

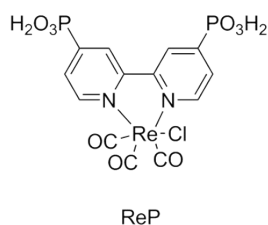

**Scheme S2.** The chemical structure of **ReP**.

## Synthesis of Calix-Br

**Calix-Br** was prepared according to the method reported in our previous literature.<sup>3</sup>

## Synthesis of Calix-2

**Calix-Br** (100.00 mg, 0.10 mmol), 2,2'-Bithiophene-5-boronic acid (198.10 mg, 0.83 mmol), and Pd(PPh<sub>3</sub>)<sub>4</sub> (60.88 mg, 0.05 mmol) were added to a flask under nitrogen atmosphere, and then K<sub>2</sub>CO<sub>3</sub> (239.40 mg, 2.08 mmol, 2 M) aqueous solution and dimethoxyethane (15 mL) was added in the flask by injection syringe after

removing oxygen. The reaction was refluxed to 90 °C for 30 h, following by TLC detection of reaction (PE:DCM = 3:1 v/v). The reaction was quenched by adding deionized water, cooled to room temperature, extracted by ammonium hydroxide and dichloromethane, and then the organic phase was dried over anhydrous Na<sub>2</sub>SO<sub>4</sub> subsequently. The crude product was obtained by concentrating and evaporating the organic phase in vacuum. Through pre-absorbed with silicone gel, the crude product was further purified by silica gel column chromatography using a mixture of dichloromethane and petroleum ether (6:1). The pale yellow-green solid was crystallized in methanol and dichloromethane. Yield: 82%. Melting point: 230 °C. <sup>1</sup>H NMR (400 MHz, CDCl<sub>3</sub>) δ: 7.11 (dd, *J* = 5.1, 1.0 Hz, 1H), 7.05-7.00 (m, 1H), 6.99-6.88 (m, 3H), 6.82 (d, *J* = 3.7 Hz, 1H), 6.72 (d, *J* = 3.6 Hz, 1H), 4.49 (d, *J* = 13.2 Hz, 1H), 4.01-3.89 (m, 2H), 3.23 (d, *J* = 13.4 Hz, 1H), 1.93 (dt, *J* = 15.1, 7.5 Hz, 2H), 1.48 (dt, *J* = 14.3, 7.2 Hz, 2H), 1.02 (t, *J* = 7.4 Hz, 3H); <sup>13</sup>C NMR (125 MHz, CDCl<sub>3</sub>, ) δ: 156.5, 143.3, 137.9, 135.3, 135.3, 128.3, 127.6, 125.7, 124.5, 123.7, 123.1, 122.5, 75.1, 32.3, 31.1, 19.4, 14.1; ESI-MS: *m/z* 1327.3092 ([M + Na]<sup>+</sup>), calculated: *m/z* 1304.3196 ([M]<sup>+</sup>).

### Synthesis of Calix-2-Br

**Calix-2** (134.00 mg, 0.10 mmol) and N-Bromosuccinimide (151.30 mg, 0.85 mmol) was added to 10 mL 2-butanone in a flask, which was stirred out of light at room temperature for overnight. The process of reaction was monitored by TLC and sodium thiosulfate (320.00 mg, 2.20 mmol) aqueous solution was added to reduct the rest of N-bromosuccinimide. The mixture was extracted by dichloromethane and deionized water three times, and then the organic phase was dried over anhydrous Na<sub>2</sub>SO<sub>4</sub>, concentrated and evaporated in vacuum, subsequently. The yellow-green powder was crystallized in methanol and dichloromethane. Yield: 89.8%. Melting point: 191 °C. <sup>1</sup>H NMR (400 MHz, CDCl<sub>3</sub>) δ 6.92 (d, *J* = 10.6 Hz, 2H), 6.89 (d, *J* = 3.8 Hz, 1H), 6.83-6.77 (m, 1H), 6.77 (s, 2H), 4.51 (d, *J* = 13.3 Hz, 1H), 3.97 (t, *J* = 7.4 Hz, 2H), 3.25 (d, *J* = 13.4 Hz, 1H), 1.95 (dt, *J* = 14.8, 7.5 Hz, 2H), 1.49 (dt, *J* = 14.7, 7.5 Hz, 2H), 1.04 (t, *J* = 7.4 Hz, 3H); <sup>13</sup>C NMR (125 MHz, CDCl<sub>3</sub>) δ: 156.6,

143.9, 139.3, 135.3, 134.4, 130.5, 128.1, 125.7, 124.5, 123.0, 122.5, 110.3, 75.2, 32.3, 31.0, 19.4, 14.1; ESI-MS:  $m/z$  1638.9510 ( $[M + Na]^+$ , calculated:  $m/z$  1615.9617 ( $[M]^+$ ).

### Synthesis of C4BTP

**Calix-2-Br** (200.00 mg, 0.12 mmol), pyridine-4-boronic acid (121.78 mg, 0.99 mmol), and Pd(PPh<sub>3</sub>)<sub>4</sub> (11.44 mg, 0.10 mmol) were added to a flask under nitrogen atmosphere, and then K<sub>2</sub>CO<sub>3</sub> (276.00 mg, 2.00 mmol, 2 M) aqueous solution and dimethoxyethane(10 mL) was added in the flask by using injection syringe after bubbling pure nitrogen 20 min to remove oxygen in the solution. The reaction was refluxed at 90 °C for 60 h, following TCL monitoring. The reaction was quenched by adding 0.2 M HCl aqueous solution, cooled to room temperature, extracted with dichloromethane, and then the organic phase was dried over anhydrous Na<sub>2</sub>SO<sub>4</sub> subsequently. The crude product was obtained by concentrating and evaporating in vacuum, further purified by silica-gel column chromatography using an eluent consisting of dichloromethane, ethyl acetate, triethylamine and methanol (30 : 10 : 3 : 1). The orange powder was crystallized in methanol. Yield: 54.8%. Melting point: > 300 °C (decomposition). <sup>1</sup>H NMR (400 MHz, CDCl<sub>3</sub>)  $\delta$  8.50 (d,  $J$  = 6.1 Hz, 2H), 7.30 (d,  $J$  = 3.9 Hz, 2H), 7.25 (d,  $J$  = 3.8 Hz, 1H), 7.07-7.02 (m, 1H), 7.00 (s, 2H), 6.97 (d,  $J$  = 3.6 Hz, 1H), 6.84 (d,  $J$  = 3.6 Hz, 1H), 4.55 (d,  $J$  = 13.4 Hz, 1H), 4.00 (t,  $J$  = 7.4 Hz, 2H), 3.29 (d,  $J$  = 13.4 Hz, 1H), 1.97 (dt,  $J$  = 15.1, 7.6 Hz, 2H), 1.51 (dt,  $J$  = 14.6, 7.4 Hz, 2H), 1.06 (t,  $J$  = 7.4 Hz, 3H); <sup>13</sup>C NMR (125 MHz, CDCl<sub>3</sub>, )  $\delta$ : 156.8, 150.1, 144.6, 141.1, 139.9, 138.5, 135.4, 134.7, 128.0, 126.1, 125.8, 125.1, 124.0, 122.7, 119.1, 75.2, 32.3, 31.1, 19.4, 14.1; ESI-MS:  $m/z$  1635.4178 ( $[M + Na]^+$ ), calculated:  $m/z$  1635.4156 ( $[M + Na]^+$ ).

### Synthesis of ReP

ReCl(bpy)(CO)<sub>3</sub> (**ReP**) was prepared according to the method reported in literature.<sup>4</sup>

### Preparation of C4BTP-TiO<sub>2</sub> materials

C4BTP-TiO<sub>2</sub> materials were prepared through a sol-gel method. Tetrabutyl titanate (1 mL), acetic acid (168  $\mu$ L), deionized water (106  $\mu$ L) and THF (1 mL) were

added into 20 mL glass bottle and the mixture was stirred at room temperature, and then calculated weight of **C4BTP** dissolved in THF (1 mL) was dropwise added. The transparent gelatum was formed in several minutes and was soxhleted with deionized water for 72 h and then evaporated to dryness at room temperature to obtain orange-red solid. Lastly, the solid was calcined in Muffle furnace at 200 °C for 2 h. The materials of 1.0/2.5/5.0/7.5 wt% C4BTP-TiO<sub>2</sub> were different in the doping amount of **C4BTP**. Similarly, gel-TiO<sub>2</sub> material was prepared though the same procedure but without dye doping.

#### **Preparation of Pt/C4BTP-TiO<sub>2</sub> photocatalysts**

Hybrid material (100 mg), distilled water (80 mL), methanol (10 mL) and 10 mM H<sub>2</sub>PtCl<sub>6</sub> aqueous solution (334 μL) were added into a quartz reactor. The mixture was degassed by vacuuming and irradiated with 300 W xeon lamp (without filter) for 30 min, and then the Pt nanoparticles were loaded onto C4BTP-TiO<sub>2</sub>. Pt loading (0.65 wt%) was testified by the inductively coupled plasma atomic emission spectrometry (ICP-AES).

#### **Preparation of sensitized Pt/gel-TiO<sub>2</sub>/C4BTP photocatalysts**

Pt nanoparticles were loaded onto gel-TiO<sub>2</sub> by the photo deposition method mentioned above. The as-prepared gel-TiO<sub>2</sub> powder (94 mg) was dispersed in 0.3 mM THF solution of C4BTP (10 mL) and stirred at room temperature for 6 h in the dark, and then centrifuged and washed with THF until the eluent was colourless. The solid was dried in vacuum at room temperature for overnight. The amount of adsorbed C4BTP was determined to be 4.9 wt% by testing the ΔAbs of the THF solution before/after dye sensitization.

#### **Preparation of ReP/C4BTP-TiO<sub>2</sub> (5.0 wt%) photocatalysts**

C4BTP-TiO<sub>2</sub> (5.0 wt%) (10 mg) and 0.8 mM ReP aqueous solution (0.375 mL) were added into deionized water and stirred for 4 h. The mixture was centrifuged and the precipitated powder was washed with distilled water for 3 times and then dried in vacuum at room temperature for overnight.

#### **Theoretical calculation of C4BTP**



The electronic structures of **C4BTP** were calculated by using density functional theory (DFT) computation at the M06-2X<sup>5</sup>/6-31G(d,p)<sup>6</sup> level in the Gaussian 09 package.<sup>7</sup>

### **Photocatalytic H<sub>2</sub> production**

The photocatalytic H<sub>2</sub> production experiments were performed in a glass reactor with quartz cover connected to a closed gas circulation, in which the reaction mixture can be degassed by vacuuming. 20 mg photocatalyst was dispersed in 100 mL of 10 vol% TEOA aqueous solution (pH  $\approx$  12). Then the suspension was stirred continuously and irradiated by a 300 W Xe lamp with a cut-off filter ( $\lambda > 420$  nm). The amount of produced H<sub>2</sub> was determined at an interval of 1 h with online gas chromatography.

### **Photocatalytic CO<sub>2</sub> reduction**

ReP/C4BTP-TiO<sub>2</sub> (10 mg), dry DMF (10 mL), and 1,3-dimethyl-2-phenyl- 1,3-dihydrobenzimidazole (BIH) (134 mg) were added into a 40 mL quartz bottle. The suspension was degassed by alternately vacuumed and bubbled with N<sub>2</sub> for 3 times, followed by bubbling with pure CO<sub>2</sub> for 30 min. Then the mixture in bottle was sealed with a septum and irradiated using a 300 W Xe lamp with a cut-off filter ( $\lambda > 420$  nm). The gaseous products were aspirated with syringe and determined by injection into gas chromatography (Fuli Model GC9790 II equipped with TCD and FID detectors and TDX-01 packed column).

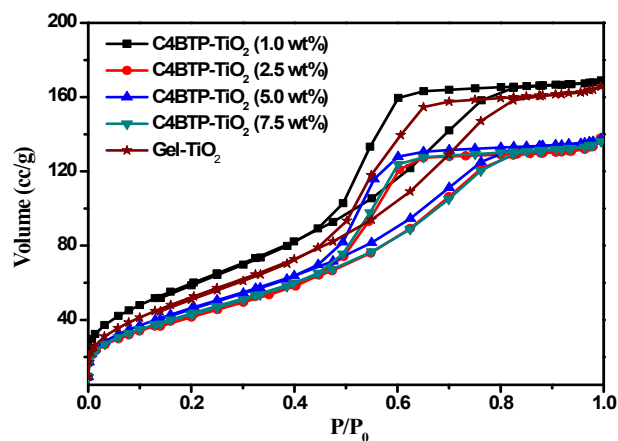

**Fig. S1.** N<sub>2</sub> adsorption-desorption isotherms of gel-TiO<sub>2</sub> and C4BTP-TiO<sub>2</sub> (1.0/2.5/5.0/7.5 wt%) at 77 K.

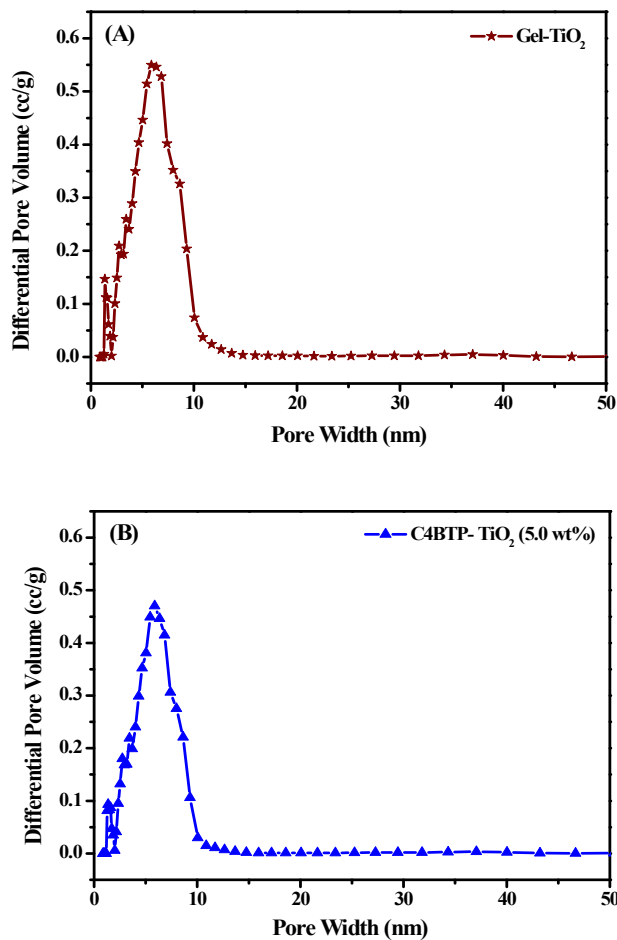

**Fig. S2.** The pore size distributions of A) gel-TiO<sub>2</sub> and B) C4BTP-TiO<sub>2</sub> (5.0 wt%) .

**Table S1.** BET surface areas, pore volumes and pore widths of gel-TiO<sub>2</sub> and C4BTP-TiO<sub>2</sub> (1.0 / 2.5 / 5.0 / 7.5 wt%) derived from 77 K N<sub>2</sub> sorption isotherms.

|                                     | C4BTP-TiO <sub>2</sub><br>(1.0 wt%) | C4BTP-TiO <sub>2</sub> (2.5<br>wt%) | C4BTP-TiO <sub>2</sub><br>(5.0 wt%) | C4BTP-TiO <sub>2</sub><br>(7.5 wt%) | Gel-TiO <sub>2</sub> |
|-------------------------------------|-------------------------------------|-------------------------------------|-------------------------------------|-------------------------------------|----------------------|
| Surface Area<br>(m <sup>3</sup> /g) | 223.3                               | 160.2                               | 174.8                               | 162.8                               | 197.7                |
| Volume (ml/g)                       | 0.261                               | 0.213                               | 0.213                               | 0.211                               | 0.256                |
| Pore Width (nm)                     | 1.48/5.86                           | 1.28/5.96                           | 1.36/5.88                           | 1.27/6.20                           | 1.36/6.12            |
| Micropore                           |                                     |                                     |                                     |                                     |                      |
| Surface Area<br>(m <sup>3</sup> /g) | 161.4                               | 182.3                               | 136.8                               | 236.1                               | 215.9                |
| Mesoporous                          |                                     |                                     |                                     |                                     |                      |
| Surface Area<br>(m <sup>3</sup> /g) | 205.2                               | 164.8                               | 164.6                               | 150.0                               | 189.4                |

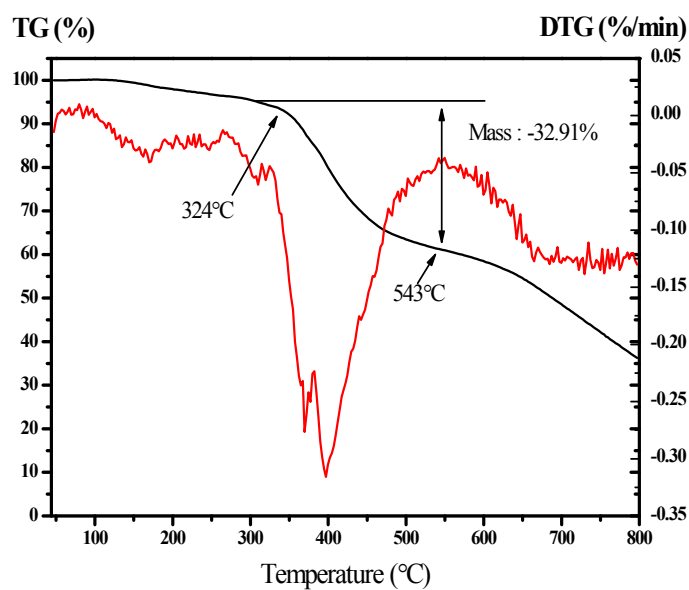

**Fig. S3.** The TG-DTG spectrum of C4BTP.

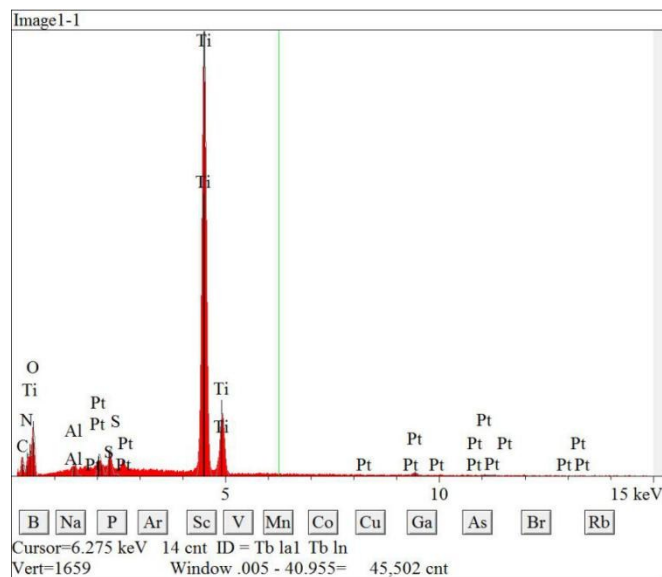

**Fig. S4.** The EDX result of Pt/C4BTP-TiO<sub>2</sub> (5.0 wt%).

**Table S2.** ICP-AES results of ReP loading and calculated TON values of corresponding catalysts.

| Sample                                 | ReP adding amount (μmol) | Measured ReP loading amount (μmol) | TON <sub>ReP</sub> |
|----------------------------------------|--------------------------|------------------------------------|--------------------|
| ReP/C4BTP-TiO <sub>2</sub> (5 wt%)     | 0.1                      | 0.0628                             | 44.6               |
|                                        |                          | 0.0636                             | 44.0               |
| ReP/C4BTP-TiO <sub>2</sub> (5 wt%)     | 0.3                      | 0.165                              | 49.1               |
|                                        |                          | 0.161                              | 50.3               |
| ReP/C4BTP-TiO <sub>2</sub> (5 wt%)     | 0.6                      | 0.253                              | 40.1               |
|                                        |                          | 0.261                              | 38.9               |
| ReP/C4BTP/gel-TiO <sub>2</sub> (5 wt%) | 0.3                      | 0.28                               | 12.5               |
|                                        |                          | 0.27                               | 12.9               |
| ReP/gel-TiO <sub>2</sub>               | 0.3                      | 0.25                               | 5.1                |
|                                        |                          | 0.27                               | 4.7                |

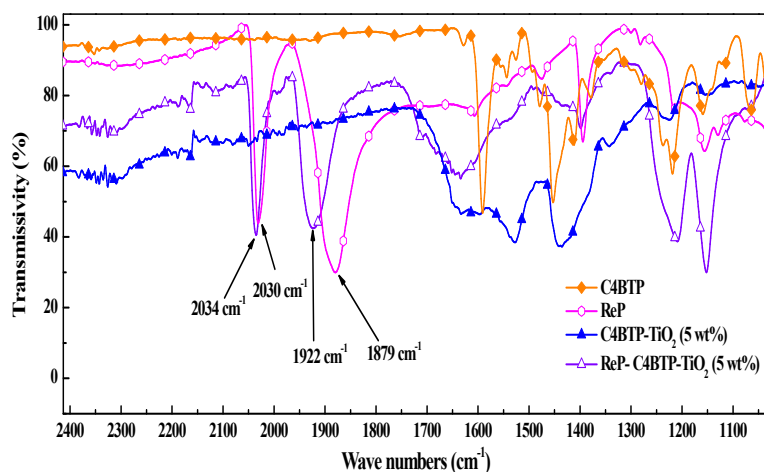

**Fig. S5.** ATR-IR spectra of **C4BTP**, **C4BTP-TiO<sub>2</sub>** (5.0 wt%), **ReP** and **ReP/C4BTP-TiO<sub>2</sub>** (5.0 wt%).

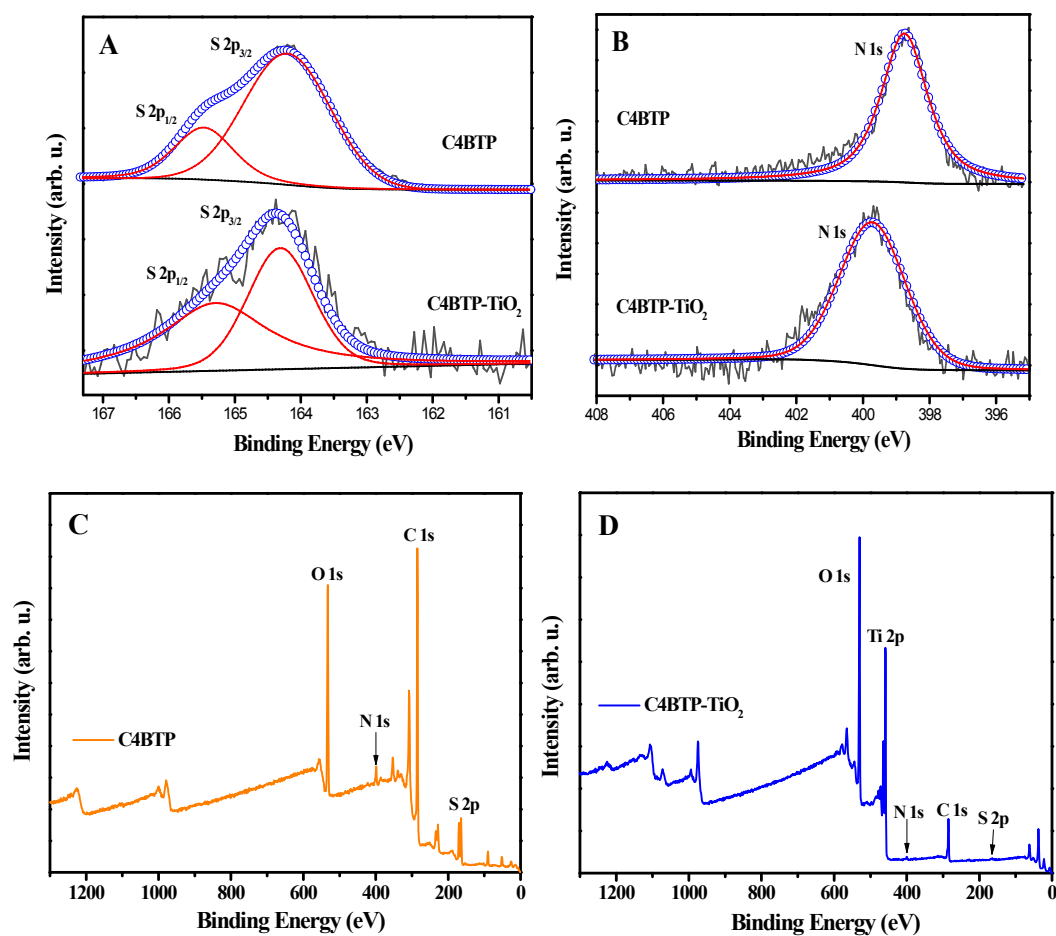

**Fig. S6.** A) S 2p and B) N 1s XPS spectra for **C4BTP** and **C4BTP-TiO<sub>2</sub>** (5.0 wt%), and full XPS spectra of C) **C4BTP** and D) **C4BTP-TiO<sub>2</sub>** (5.0 wt%) samples.

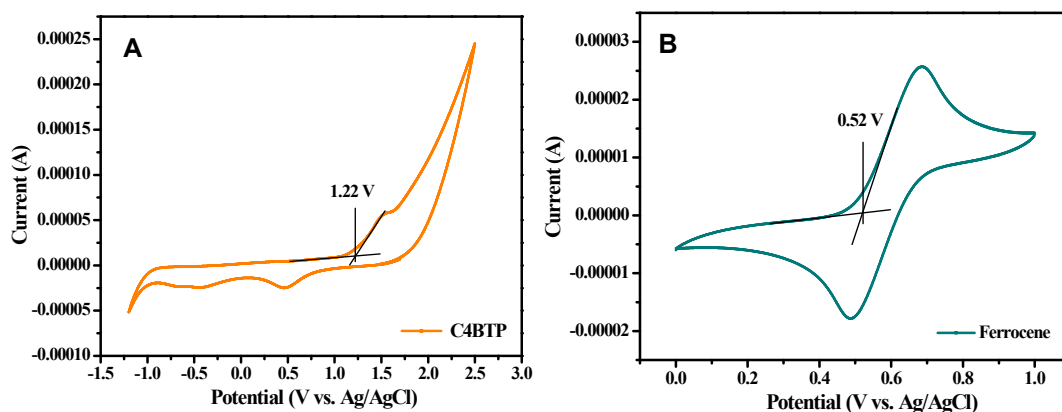

**Fig. S7.** Cyclic voltammogram of A) C4BTP and B) ferrocene in 0.1 M TBAPF<sub>6</sub> in THF solution with a scan rate of 40 mV s<sup>-1</sup>.

**Table S3.** H<sub>2</sub> production data of Pt/C4BTP-TiO<sub>2</sub> with different dye contents and Pt/gel-TiO<sub>2</sub>/C4BTP materials.

| Photocatalysts                      | Activity/                                | Activity/                                                | TON <sub>[Pt]</sub> (5 h) <sup>[c]</sup> TON <sub>[dye]</sub> (5 h) <sup>[d]</sup> |      |
|-------------------------------------|------------------------------------------|----------------------------------------------------------|------------------------------------------------------------------------------------|------|
|                                     | mmol g <sup>-1</sup> h <sup>-1</sup> [a] | mmol g <sup>-1</sup> <sub>[Pt]</sub> h <sup>-1</sup> [b] |                                                                                    |      |
| Pt/C4BTP-TiO <sub>2</sub> (1.0 wt%) | 5.38                                     | 827.93                                                   | 807                                                                                | 4337 |
| Pt/C4BTP-TiO <sub>2</sub> (2.5 wt%) | 7.81                                     | 1201.64                                                  | 1172                                                                               | 2518 |
| Pt/C4BTP-TiO <sub>2</sub> (5.0 wt%) | 11.99                                    | 1844.85                                                  | 1799                                                                               | 1933 |
| Pt/C4BTP-TiO <sub>2</sub> (7.5 wt%) | 8.59                                     | 1320.84                                                  | 1288                                                                               | 923  |
| Pt/gel-TiO <sub>2</sub> /C4BTP      | 0.53                                     | 81.93                                                    | 80                                                                                 | 86   |

[a] = (H<sub>2</sub> amount in 5 h/ total mass of catalysts) / 5 h

[b] = H<sub>2</sub> amount vs. Pt loading mass = [a] / Pt loading mass fraction = [a] / 0.0065

[c] = H<sub>2</sub> amount vs. Pt loading amount = [b] × 5 × 195.05 / 1000

[d] = H<sub>2</sub> amount vs. dye loading amount = [a] × 5 × 0.001 × 1612<sup>[e]</sup> / corresponding dye loading mass fraction

**Table S4.** Performances of DSP systems based on metal-free sensitizers for photocatalytic H<sub>2</sub> production studies in recent years<sup>a</sup>.

| No. | reference                                                 | PS      | H <sub>2</sub> production | TON <sub>[dye]</sub> | time |
|-----|-----------------------------------------------------------|---------|---------------------------|----------------------|------|
| 1   | <i>ChemSusChem</i> , 2018, <b>11</b> , 793.               | AD418   | 4,359 μmol/g              | 872 <sup>b</sup>     | 20 h |
| 2   | <i>Appl. Energy Mater.</i> , 2018, <b>1</b> , 2813.       | Dyad    | 4,176 μmol/g              | 1044 <sup>b</sup>    | 6 h  |
| 3   | <i>Org. Lett.</i> , 2017, <b>19</b> , 1048.               | S1      | 63,112 μmol/g             | 10200                | 48 h |
| 4   | <i>Susta. Energy Fuels</i> , 2017, <b>1</b> , 694.        | CBZ-Th  | 10,083 μmol/g             | 2017                 | 20 h |
| 5   | <i>Int. J. Hydro. Energy</i> , 2017, <b>42</b> , 15731.   | ChI-2   | 1,580 μmol/g              | —                    | 6 h  |
| 6   | <i>Dyes Pigm.</i> , 2017, <b>139</b> , 7.                 | YFT-2   | 10,438 μmol/g             | 712 <sup>b</sup>     | 10 h |
| 7   | <i>Dyes Pigm.</i> , 2016, <b>134</b> , 498.               | D2      | 106,667 μmol/g            | 1640 <sup>b</sup>    | 16 h |
| 8   | <i>J. Mater. Chem. A</i> , 2015, <b>3</b> , 21713.        | C16     | 42,576 μmol/g             | 2930 <sup>b</sup>    | 20 h |
| 9   | <i>Int. J. Hydro. Energy</i> , 2015, <b>40</b> , 9069.    | DN5     | 93,200 μmol/g             | 1864 <sup>b</sup>    | 6 h  |
| 10  | <i>New J. Chem.</i> , 2015, <b>39</b> , 713.              | D2      | 566.9 μmol/g              | 10901                | 6 h  |
| 11  | <i>Phys. Chem. Chem. Phys.</i> , 2015, <b>17</b> , 13710. | DNPT    | 1,208 μmol/g              | 9664                 | 10 h |
| 12  | <i>J. Phys. Chem. C</i> , 2019, <b>123</b> , 70.          | G3      | 122,998 μmol/g            | 2460 <sup>b</sup>    | 5 h  |
| 13  | <i>Appl. Energy Mater.</i> , 2018, <b>1</b> , 6072.       | Dimer 2 | 81,840 μmol/g             | 2860 <sup>b</sup>    | 83 h |
| 14  | <i>Appl. Energy Mater.</i> , 2019, <b>2</b> , 448.        | Dye 1   | 99,500 μmol/g             | 11000 <sup>b</sup>   | 10 h |
| 15  | <i>J. Mater. Chem. A</i> , 2019, <b>7</b> , 19852.        | HO-TPA  | 278,235 μmol/g            | 8120                 | 75 h |
| 16  | <i>This work</i>                                          | C4BTP   | 402,400 μmol/g            | 12981                | 50 h |

<sup>a</sup>Only the best performance in each study is listed.

<sup>b</sup>In these references, TON values were calculated by the equal:  $TON = (2 \times \text{amount of H}_2) / \text{dye loading amount}$ .

**Table S5.** AQY results for H<sub>2</sub> production of Pt/C4BTP/gel-TiO<sub>2</sub> and Pt/C4BTP-TiO<sub>2</sub> with different dye contents after 0.5 h irradiation under 450 nm LED light source.

| photocatalyst                       | n(H <sub>2</sub> ) / $\mu$ mol | AQY / % |
|-------------------------------------|--------------------------------|---------|
| Pt/C4BTP/gel-TiO <sub>2</sub>       | 0.42                           | 0.16    |
| Pt/C4BTP-TiO <sub>2</sub> (1.0 wt%) | 4.23                           | 1.56    |
| Pt/C4BTP-TiO <sub>2</sub> (2.5 wt%) | 5.94                           | 2.19    |
| Pt/C4BTP-TiO <sub>2</sub> (5.0 wt%) | 9.45                           | 3.49    |
| Pt/C4BTP-TiO <sub>2</sub> (7.5 wt%) | 6.75                           | 2.50    |

**Table S6.** H<sub>2</sub> production data and calculated TON values of Pt/C4BTP-TiO<sub>2</sub> (5.0 wt%) in recycling experiment.

| Round No. | H <sub>2</sub> amount / mmol g <sup>-1</sup> | TON <sub>dye</sub> <sup>a</sup> | TON <sub>Pt</sub> <sup>b</sup> |
|-----------|----------------------------------------------|---------------------------------|--------------------------------|
| 1         | 38.76                                        | 1250                            | 1164                           |
| 2         | 37.57                                        | 1212                            | 1128                           |
| 3         | 31.60                                        | 1019                            | 949                            |
| 4         | 40.00                                        | 1290                            | 1201                           |
| 5         | 43.09                                        | 1390                            | 1294                           |
| 6         | 38.39                                        | 1238                            | 1153                           |
| 7         | 39.29                                        | 1267                            | 1180                           |
| 8         | 45.34                                        | 1463                            | 1362                           |
| 9         | 45.11                                        | 1455                            | 1355                           |
| 10        | 43.25                                        | 1395                            | 1299                           |
| Total     | 402.40                                       | 12981                           | 12084                          |

<sup>a</sup>TON<sub>dye</sub> values were calculated by the equal: TON = H<sub>2</sub> amount / dye loading amount, the loading amount of C4BTP was cauculated to be 0.031 mmol per gram catalyst;

<sup>b</sup>TON<sub>Pt</sub> values were calculated by the equal: TON = H<sub>2</sub> amount / Pt loading amount, the loading amount of Pt was cauculated to be 0.033 mmol per gram catalyst.



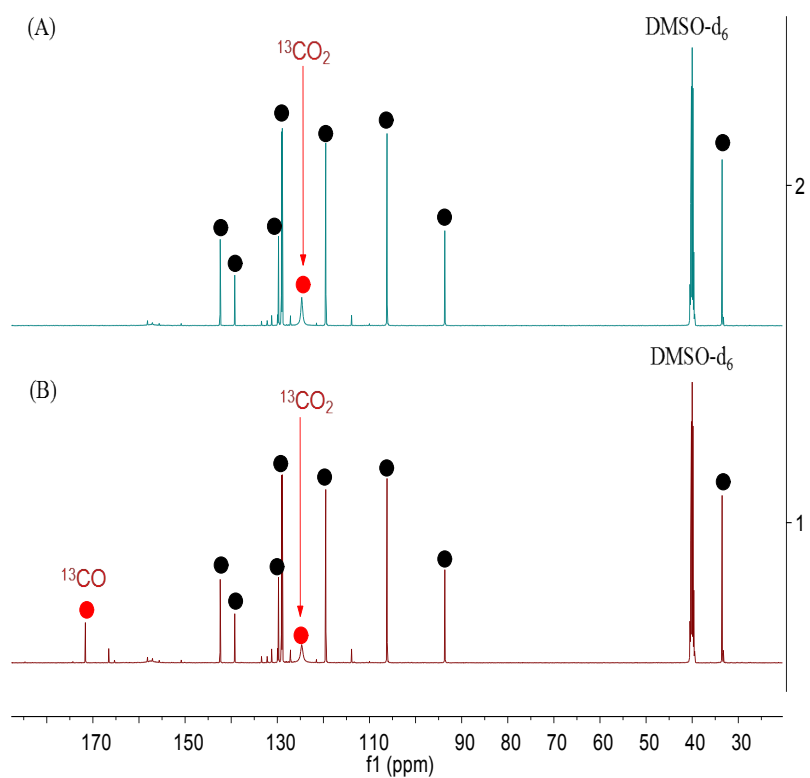

**Fig. S8.**  $^{13}\text{C}$  NMR spectra of carbon source A) before and B) after irradiation.  $^{13}\text{CO}_2$ -saturated DMSO- $d_6$  containing 5 mg of ReP/C4BTP-TiO $_2$  with BIH (67 mg) under visible light ( $\lambda > 420$  nm) irradiation for 24 h, the symbols  $\bullet$  and  $\bullet$  are on behalf of the peaks of BIH and  $^{13}\text{CO}_2/^{13}\text{CO}$ , respectively.

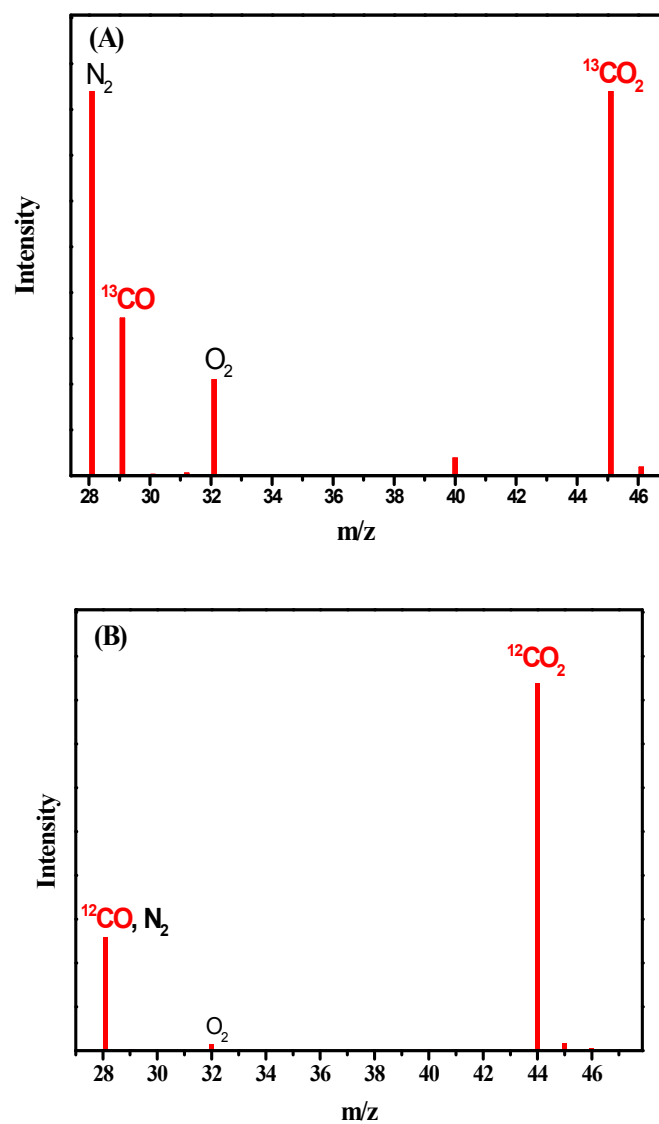

**Fig. S9.** GC-MS spectra of ReP-C4BTP-TiO<sub>2</sub> in the A)  $^{13}\text{CO}_2$ -saturated and B)  $\text{CO}_2$ -saturated DMF-*d*<sub>7</sub> with BIH under visible light ( $\lambda > 420$  nm) irradiation for 5 h.

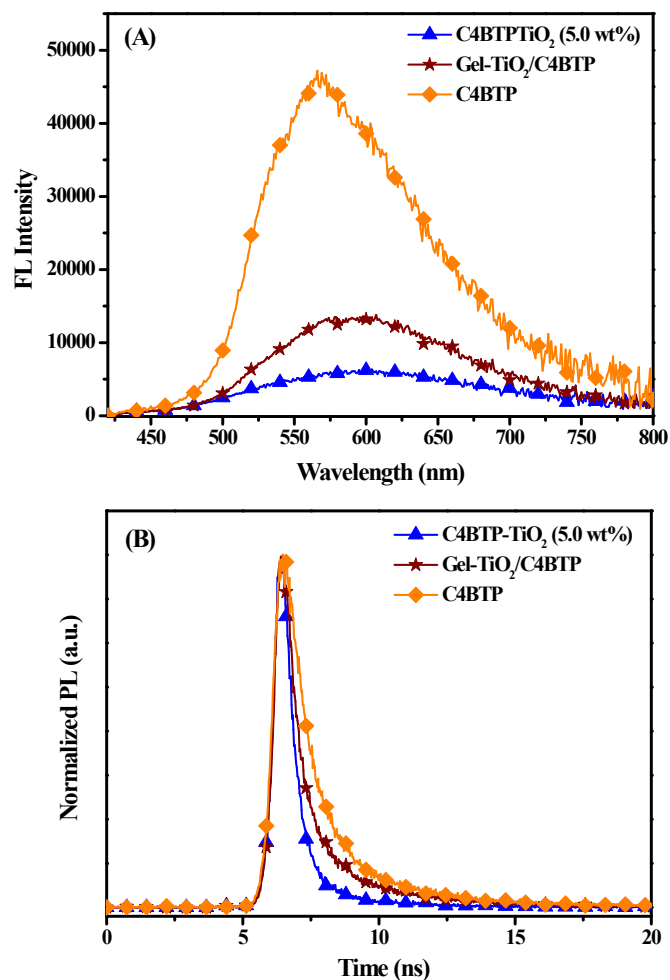

**Fig. S10.** A) Emission spectra and B) photoluminescence decays of **C4BTP**, sensitized gel-TiO<sub>2</sub>/C4BTP and C4BTP-TiO<sub>2</sub> (5.0 wt%).

## References

1. J. Pommerehne, H. Vestweber, W. Guss, R. F. Mahrt, H. Bässler, M. Porsch, J. Daub, *Adv. Mater.*, 1995, 7, 551-554.
2. A. J. Bard, L. R. Faulkner, *Electrochemical Methods: Fundamentals and Applications*, Wiley, New York, 2001.
3. L.-L. Tan, J.-M. Liu, S.-Y. Li, L.-M. Xiao, D.-B. Kuang, C.-Y. Su, *ChemSusChem*, 2015, 8, 280-287.
4. C. D. Windle, E. Pastor, A. Reynal, A. C. Whitwood, Y. Vaynzof, J. R. Durrant, R. N. Perutz, E. Reisner, *Chem. Eur. J.*, 2015, 21, 3746-3754.

5. Y. Zhao, D. G. Truhlar, *Theor. Chem. Account*, 2008, 120, 215-241.
6. G. A. Petersson, M. A. Al-Laham, *J. Chem. Phys.*, 1991, 94, 6081-6090.
7. M. J. Frisch, G. W. Trucks, H. B. Schlegel, G. E. Scuseria, M. A. Robb, J. R. Cheeseman, G. Scalmani, V. Barone, B. Mennucci, G. A. Petersson, H. Nakatsuji, M. Caricato, X. Li, H. P. Hratchian, A. F. Izmaylov, J. Bloino, G. Zheng, J. L. Sonnenberg, M. Hada, M. Ehara, K. Toyota, R. Fukuda, J. Hasegawa, M. Ishida, T. Nakajima, Y. Honda, O. Kitao, H. Nakai, T. Vreven, J. A. Montgomery, Jr., J. E. Peralta, F. Ogliaro, M. Bearpark, J. J. Heyd, E. Brothers, K. N. Kudin, V. N. Staroverov, R. Kobayashi, J. Normand, K. Raghavachari, A. Rendell, J. C. Burant, S. S. Iyengar, J. Tomasi, M. Cossi, N. Rega, J. M. Millam, M. Klene, J. E. Knox, J. B. Cross, V. Bakken, C. Adamo, J. Jaramillo, R. Gomperts, R. E. Stratmann, O. Yazyev, A. J. Austin, R. Cammi, C. Pomelli, J. W. Ochterski, R. L. Martin, K. Morokuma, V. G. Zakrzewski, G. A. Voth, P. Salvador, J. J. Dannenberg, S. Dapprich, A. D. Daniels, O. Farkas, J. B. Foresman, J. V. Ortiz, J. Cioslowski, D. J. Fox, *Gaussian 09, Revision A. 02*, Gaussian, Inc., Wallingford CT, 2009.
